# Supplementary material for: The Impact of Response Instruction and Target Group on the BIAS Map
Source: PubMed Central journal article supplement (PMC7573118; doi:10.3389/fpsyg.2020.566725), 2020-10-06
Supplement: Data_Sheet_1.pdf [file Data_Sheet_1.pdf]

## Supplementary Material

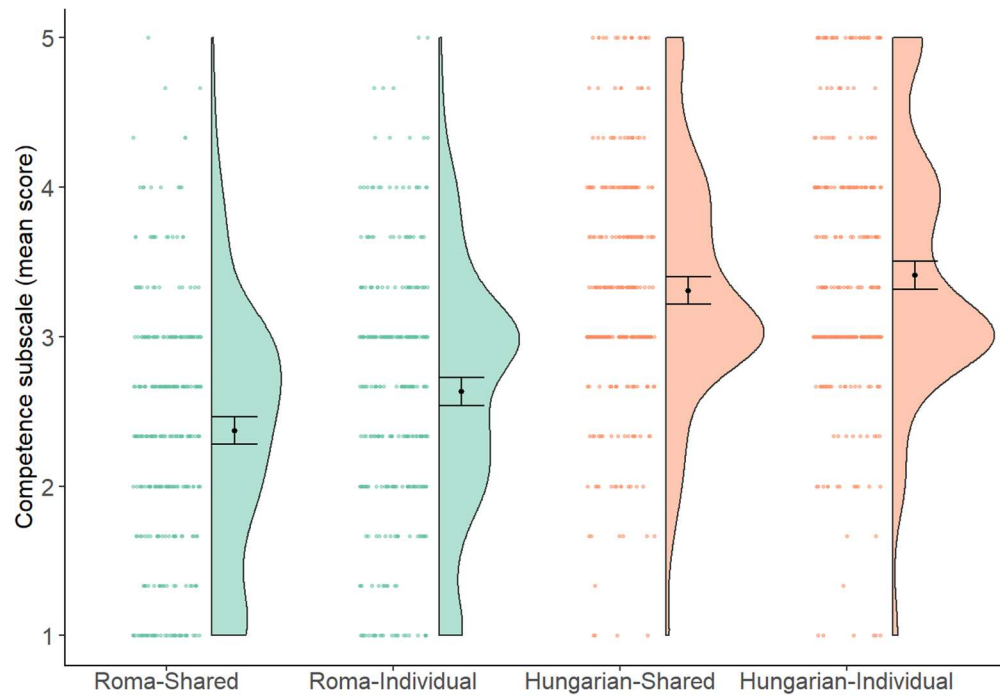

**Supplementary Figure 1.** Distributions, means and 95% confidence interval of **competence** subscale in respective experimental conditions.

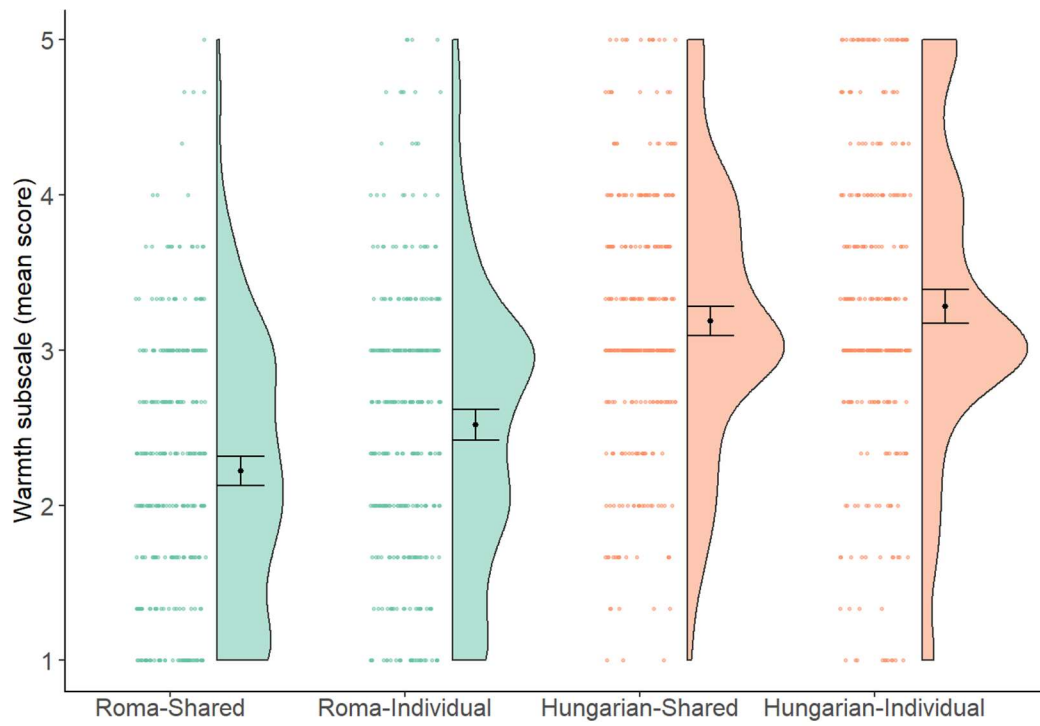

**Supplementary Figure 2.** Distributions, means and 95% confidence interval of **warmth** subscale in respective experimental conditions.

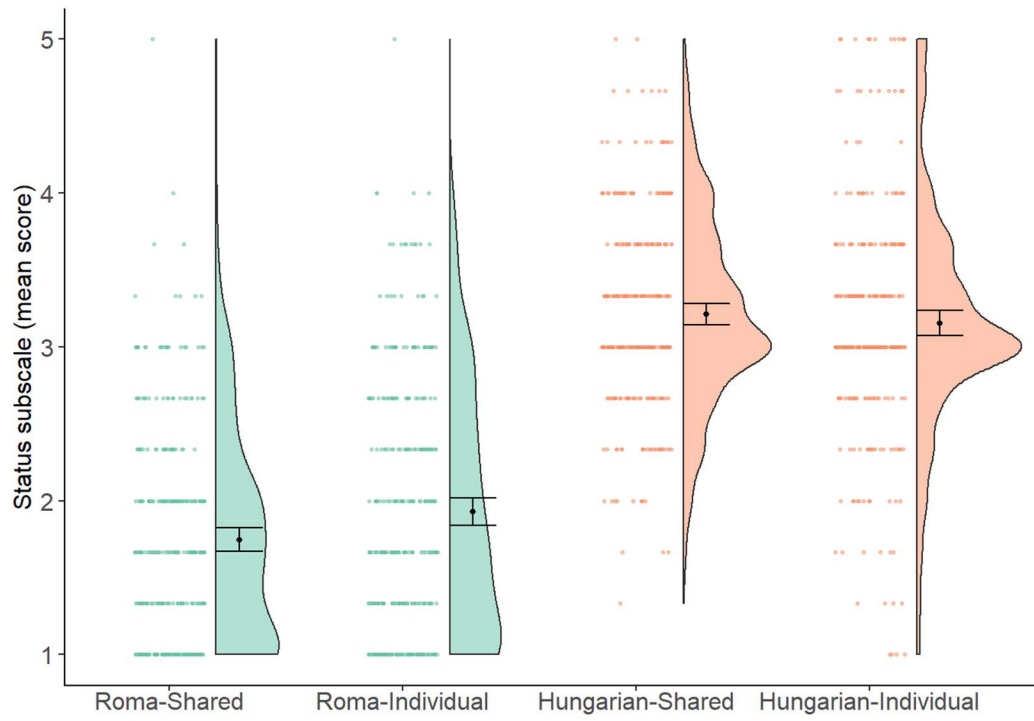

**Supplementary Figure 3.** Distributions, means and 95% confidence interval of **status** subscale in respective experimental conditions.

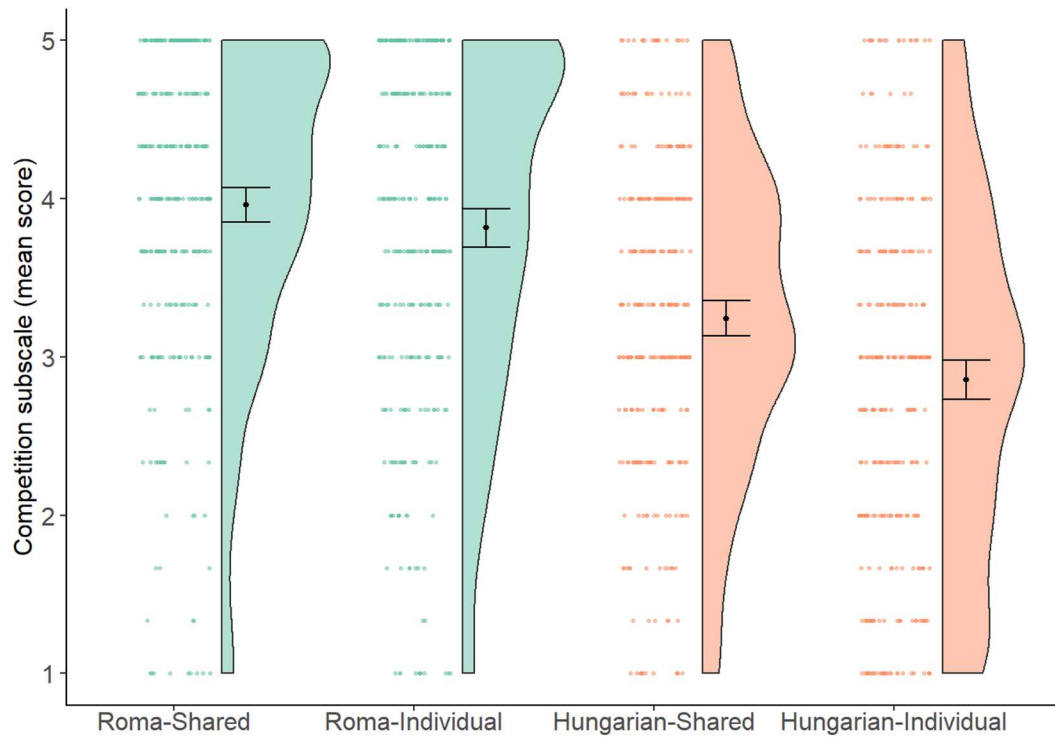

**Supplementary Figure 4.** Distributions, means and 95% confidence interval of **competition** subscale in respective experimental conditions.

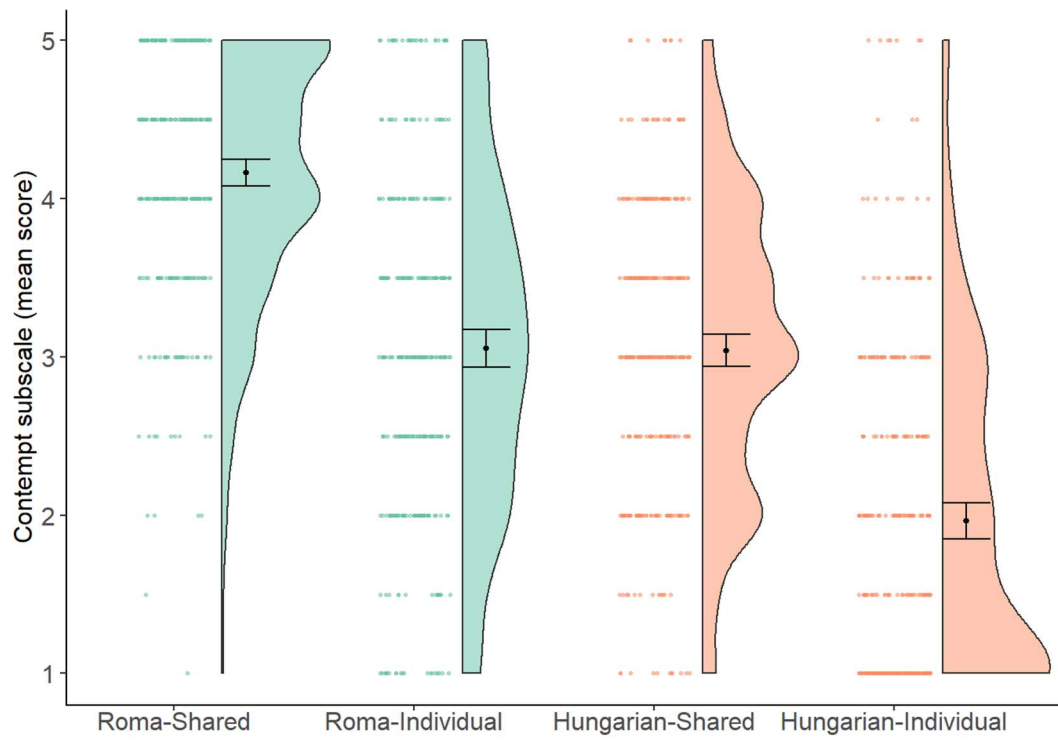

**Supplementary Figure 5.** Distributions, means and 95% confidence interval of **contempt** subscale in respective experimental conditions.

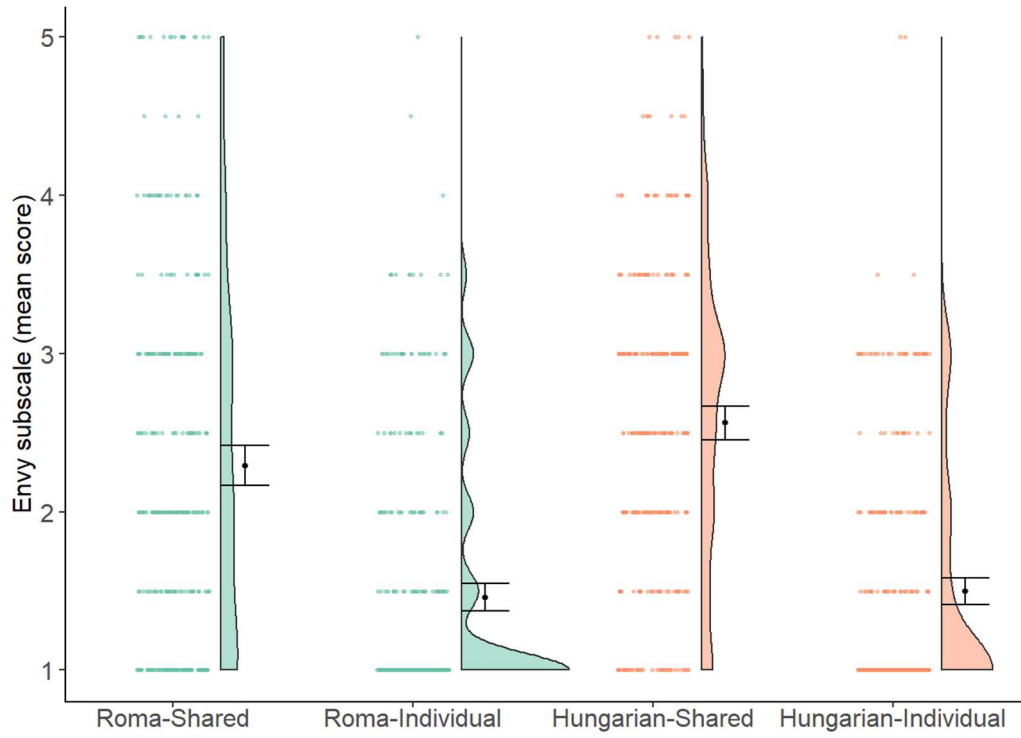

**Supplementary Figure 6.** Distributions, means and 95% confidence interval of **envy** subscale in respective experimental conditions.

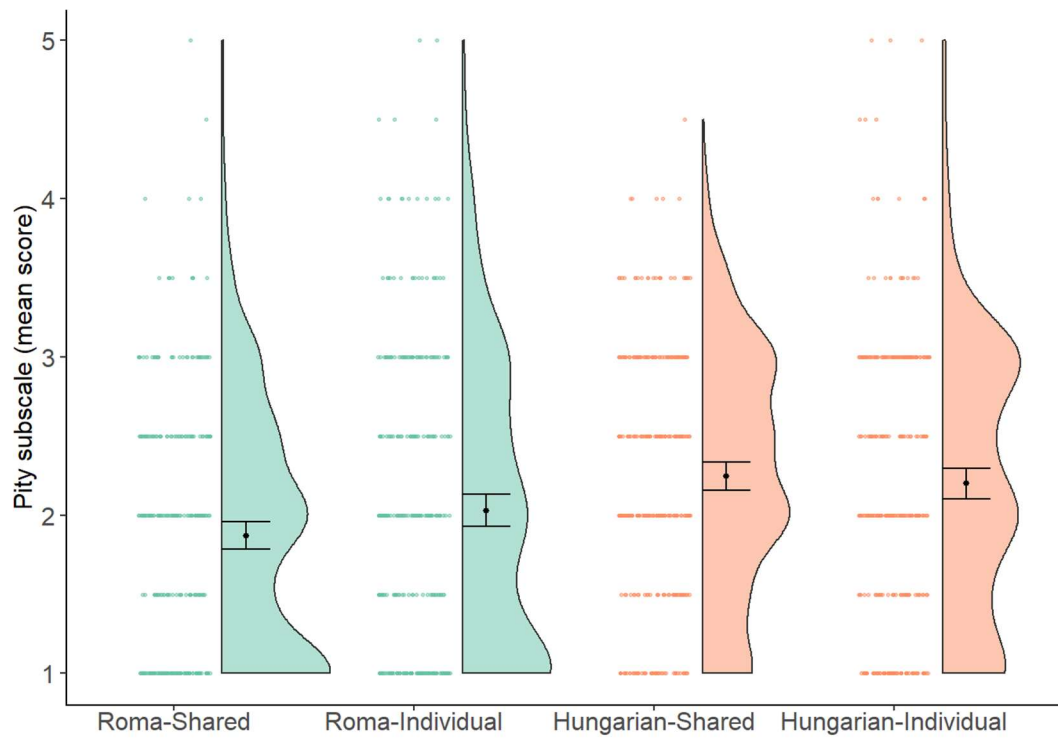

**Supplementary Figure 7.** Distributions, means and 95% confidence interval of **pity** subscale in respective experimental conditions.

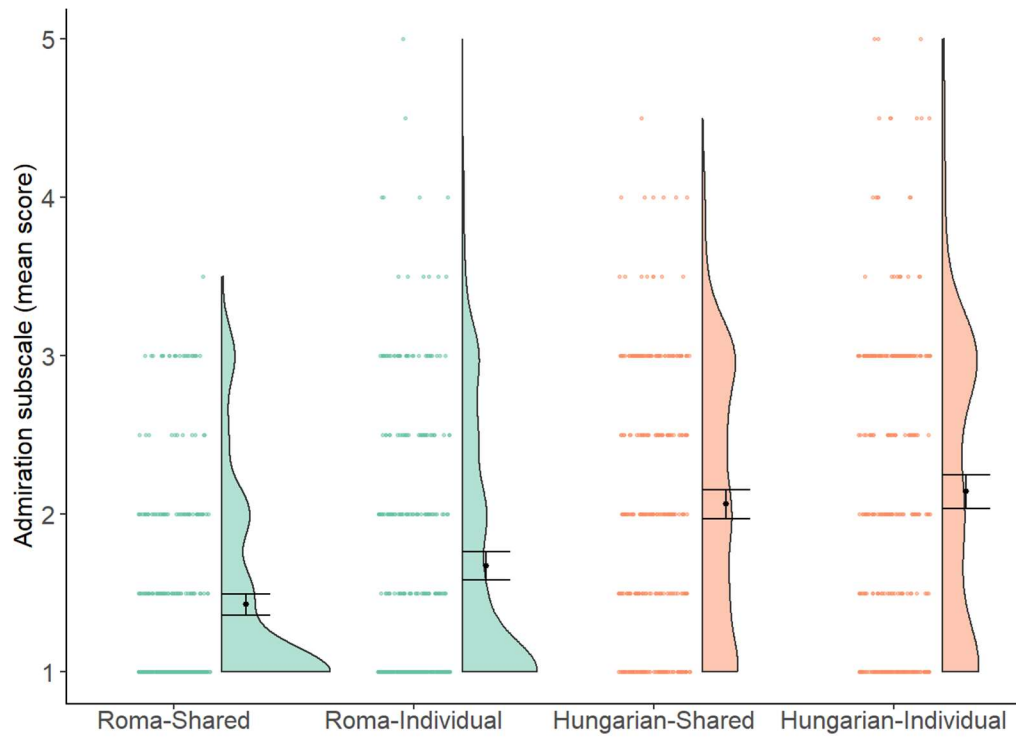

**Supplementary Figure 8.** Distributions, means and 95% confidence interval of **admiration** subscale in respective experimental conditions.



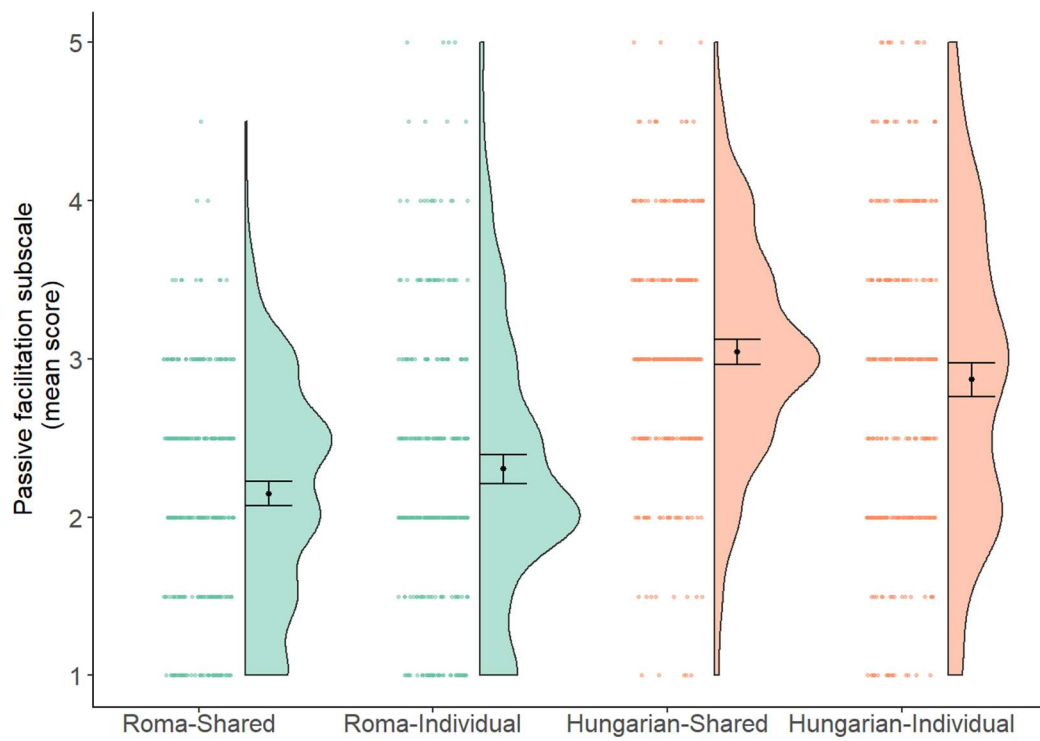

**Supplementary Figure 9.** Distributions, means and 95% confidence interval of **passive facilitation** subscale in respective experimental conditions.

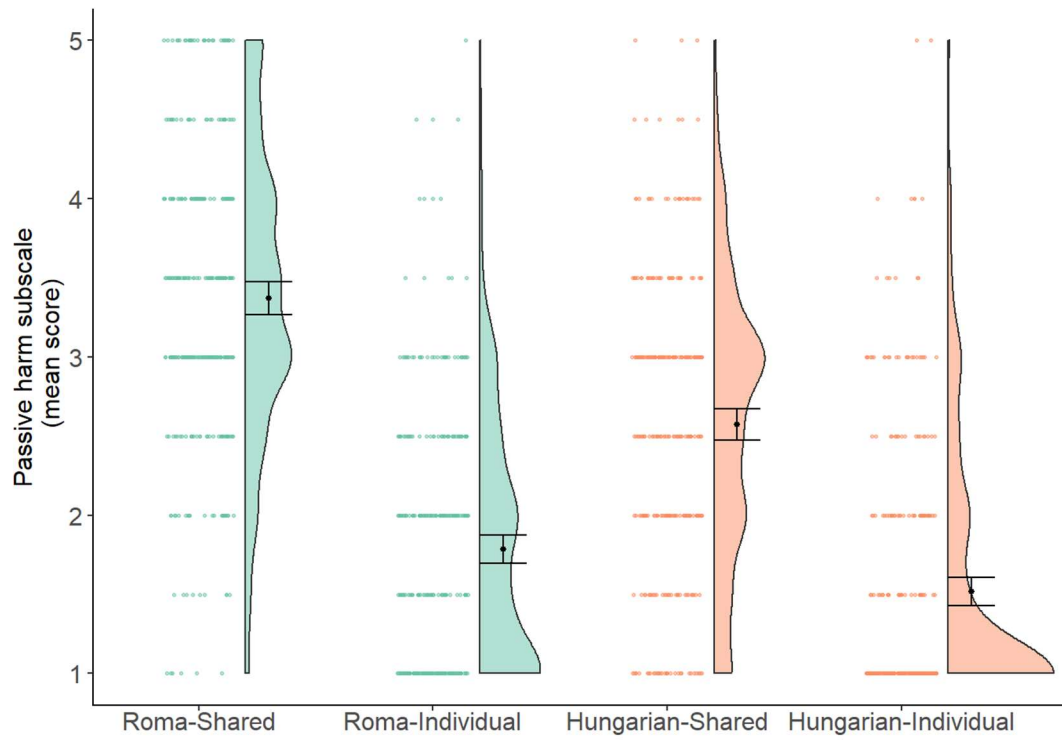

**Supplementary Figure 20.** Distributions, means and 95% confidence interval of **passive harm** subscale in respective experimental conditions.

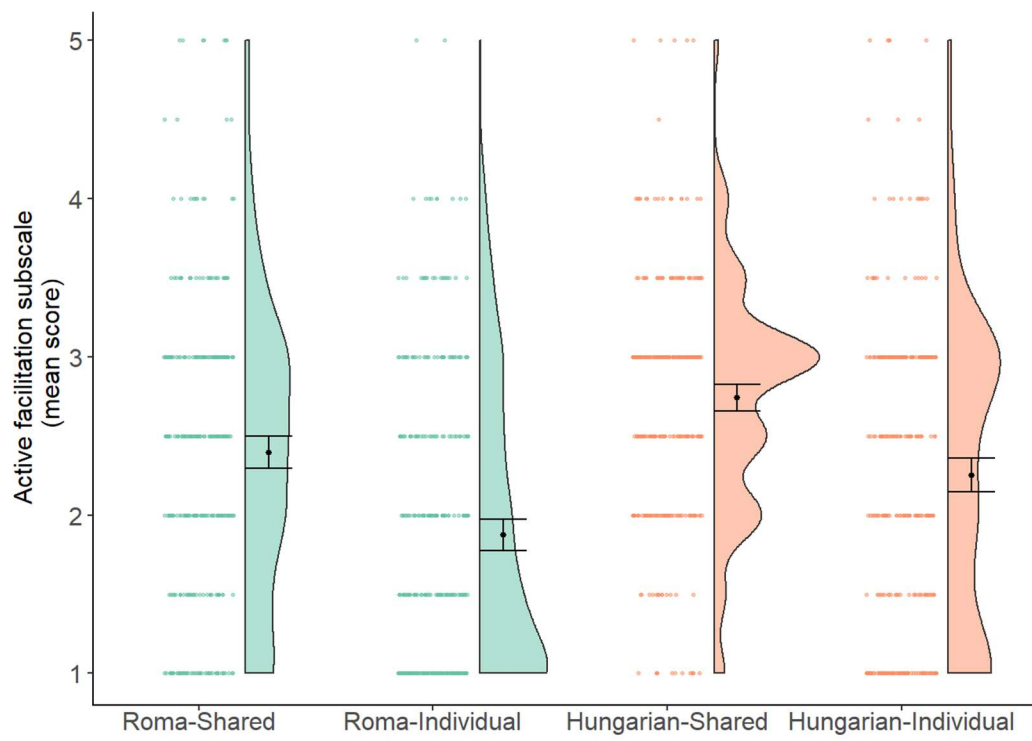

**Supplementary Figure 31.** Distributions, means and 95% confidence interval of **active facilitation** subscale in respective experimental conditions.

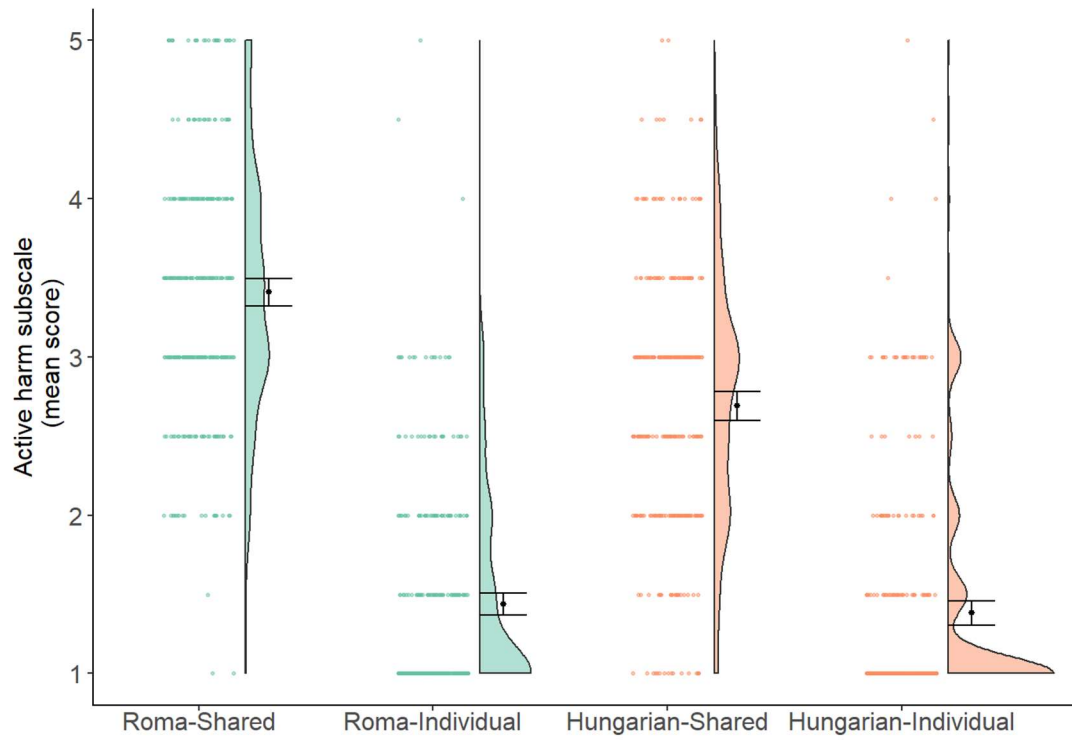

**Supplementary Figure 42.** Distributions, means and 95% confidence interval of **active harm** subscale in respective experimental conditions.

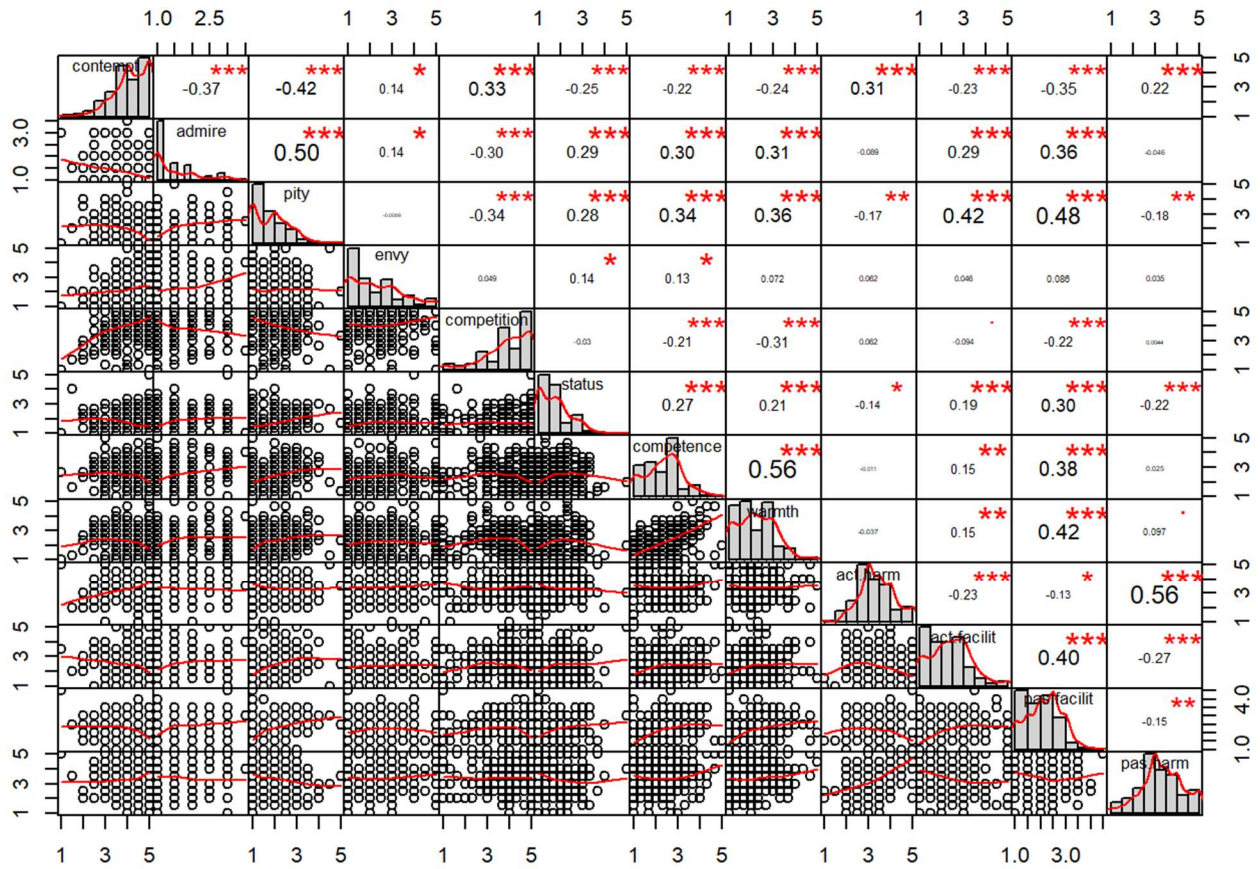

**Supplementary Figure 53.** Correlations between the BIAS map subscales in the “Roma + shared cultural perspective” experimental condition.

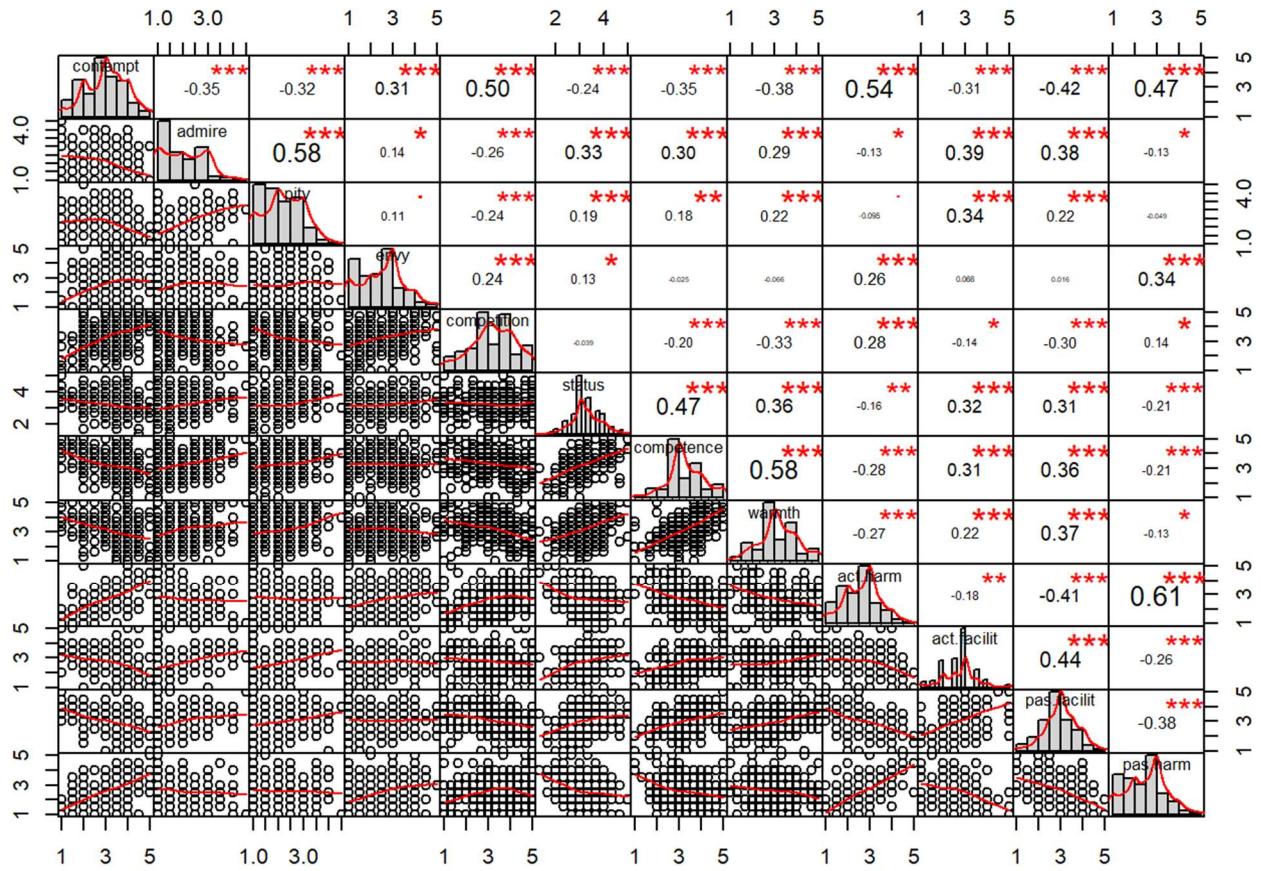

**Supplementary Figure 64.** Correlations between the BIAS map subscales in the “Hungarian + shared cultural perspective” experimental condition.

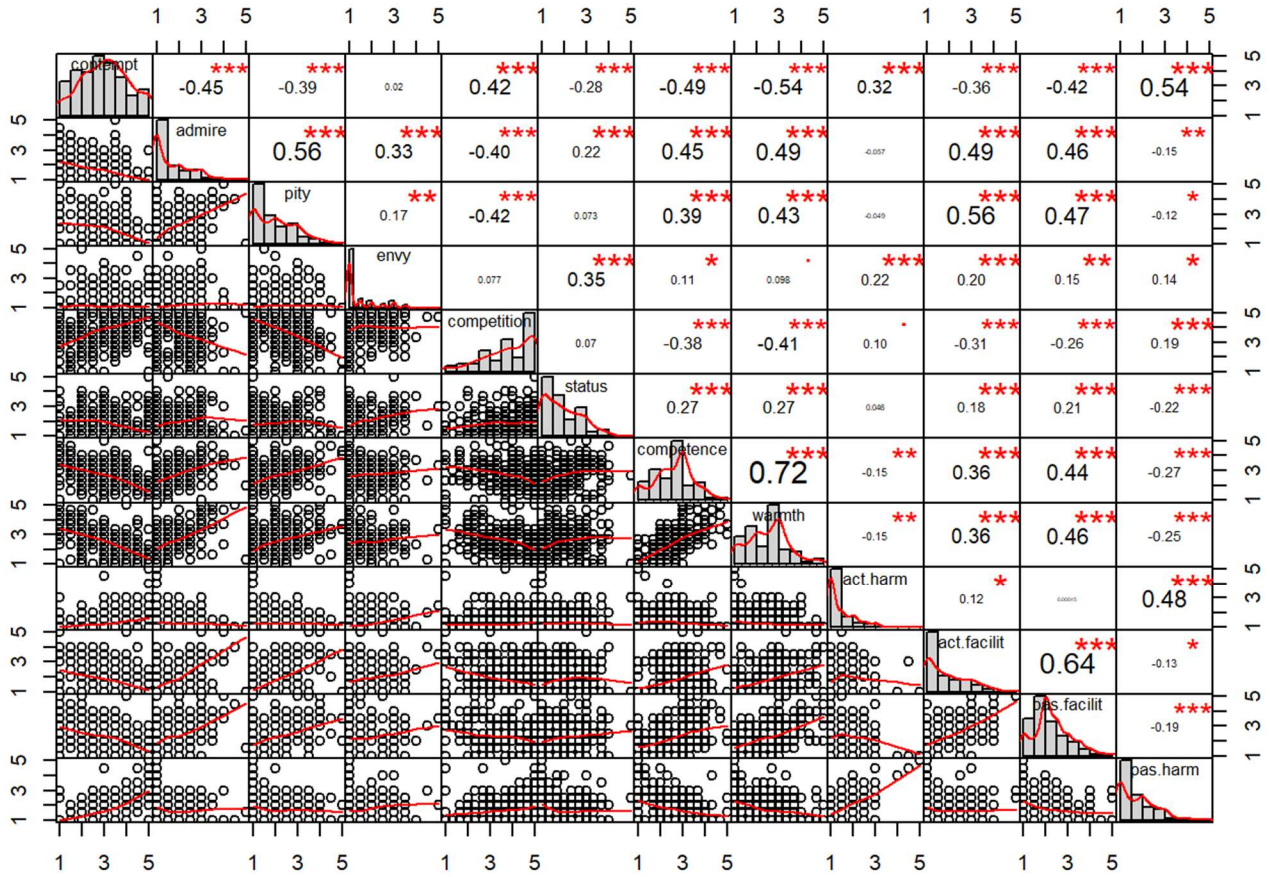

**Supplementary Figure 75.** Correlations between BIAS map subscales in the “Roma + individual perspective” experimental condition.

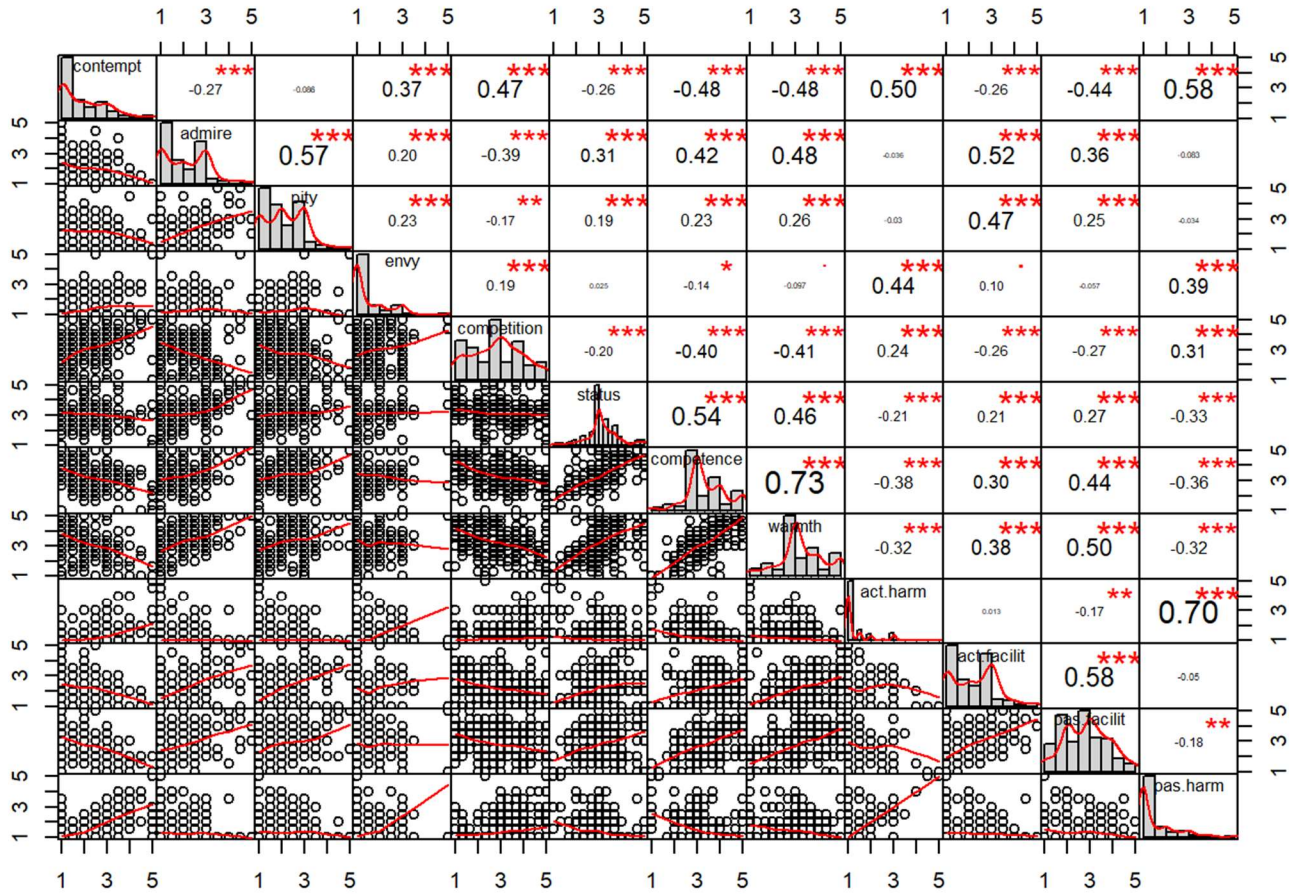

**Supplementary Figure 86.** Correlations between BIAS map subscales in the “Hungarian + individual perspective” experimental condition.



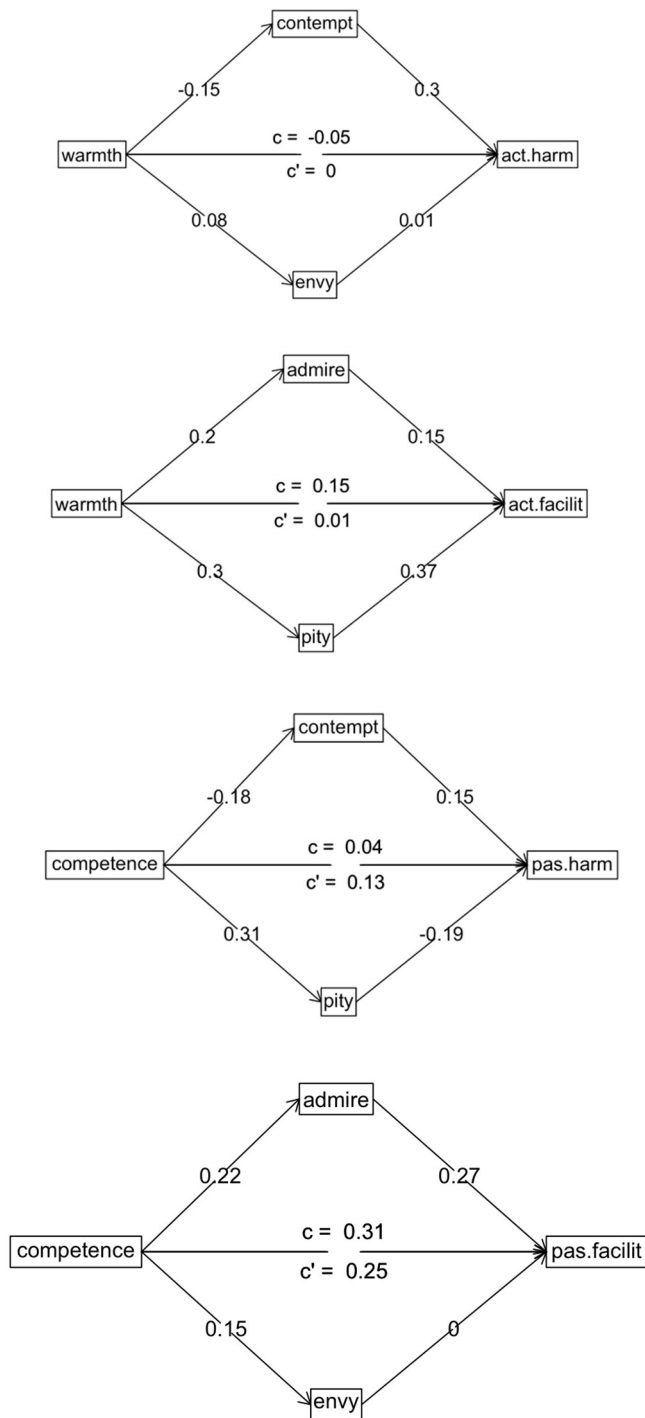

**Supplementary Figure 17.** BIAS map mediation models of stereotypes predicting emotions predicting behaviors in the “Roma + shared cultural perspective” experimental condition.

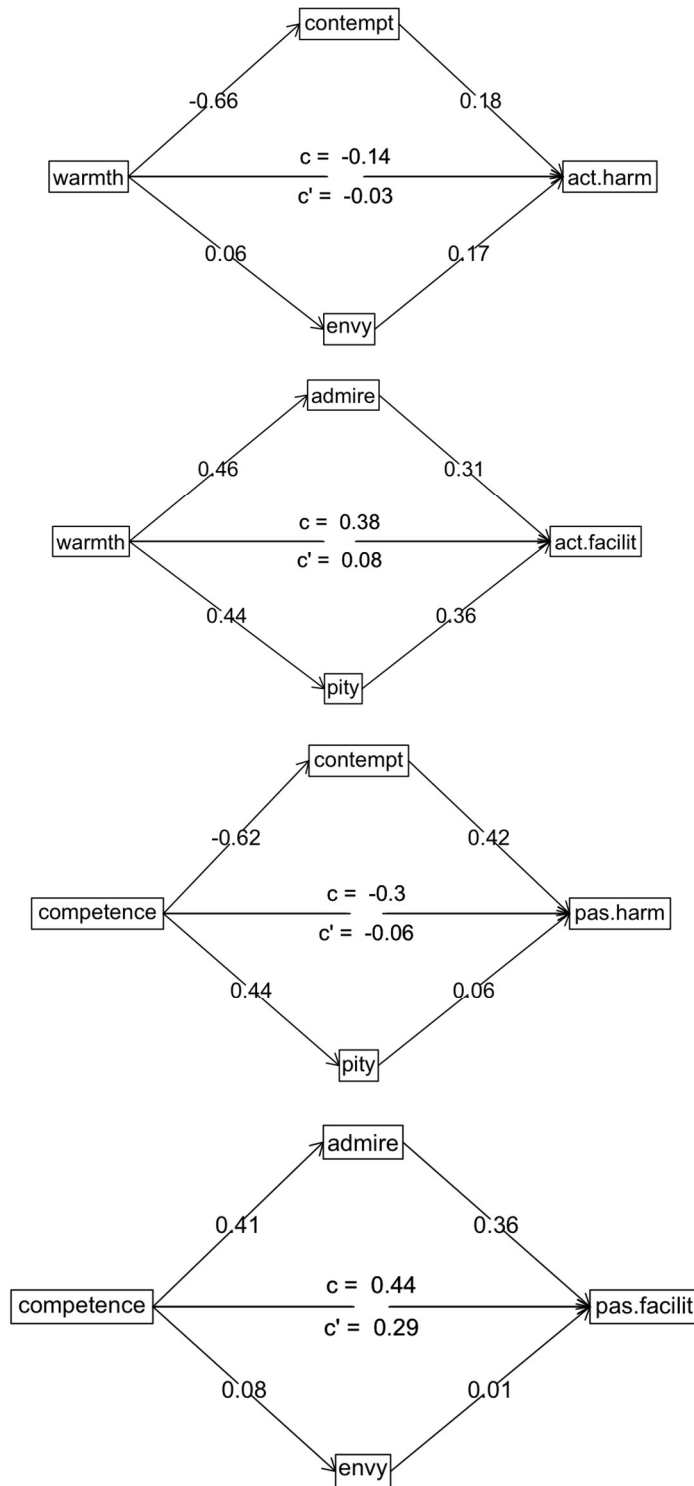

**Supplementary Figure 18.** BIAS map mediation models of stereotypes predicting emotions predicting behaviors in the “Roma + individual perspective” experimental condition.

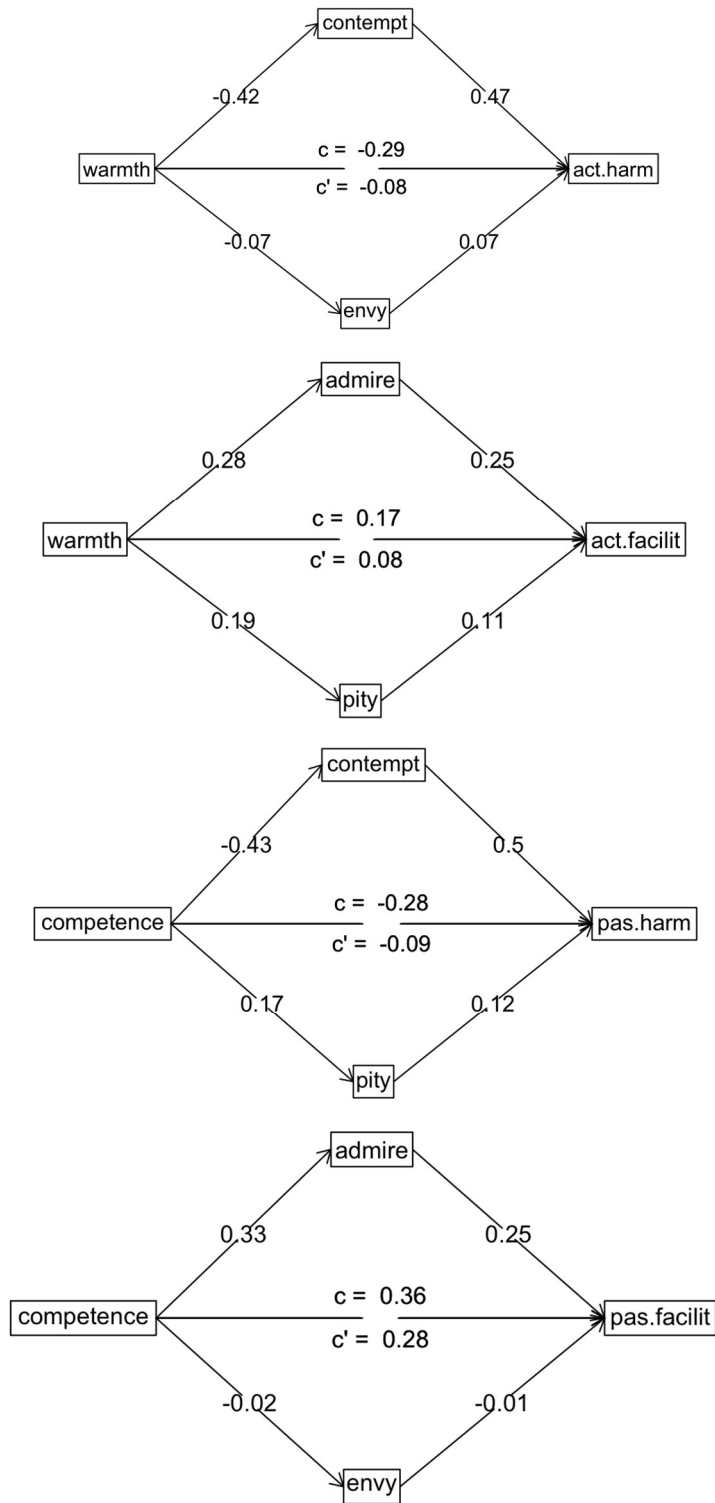

**Supplementary Figure 19.** BIAS map mediation models of stereotypes predicting emotions predicting behaviors in the “Hungarian + shared cultural perspective” experimental condition.

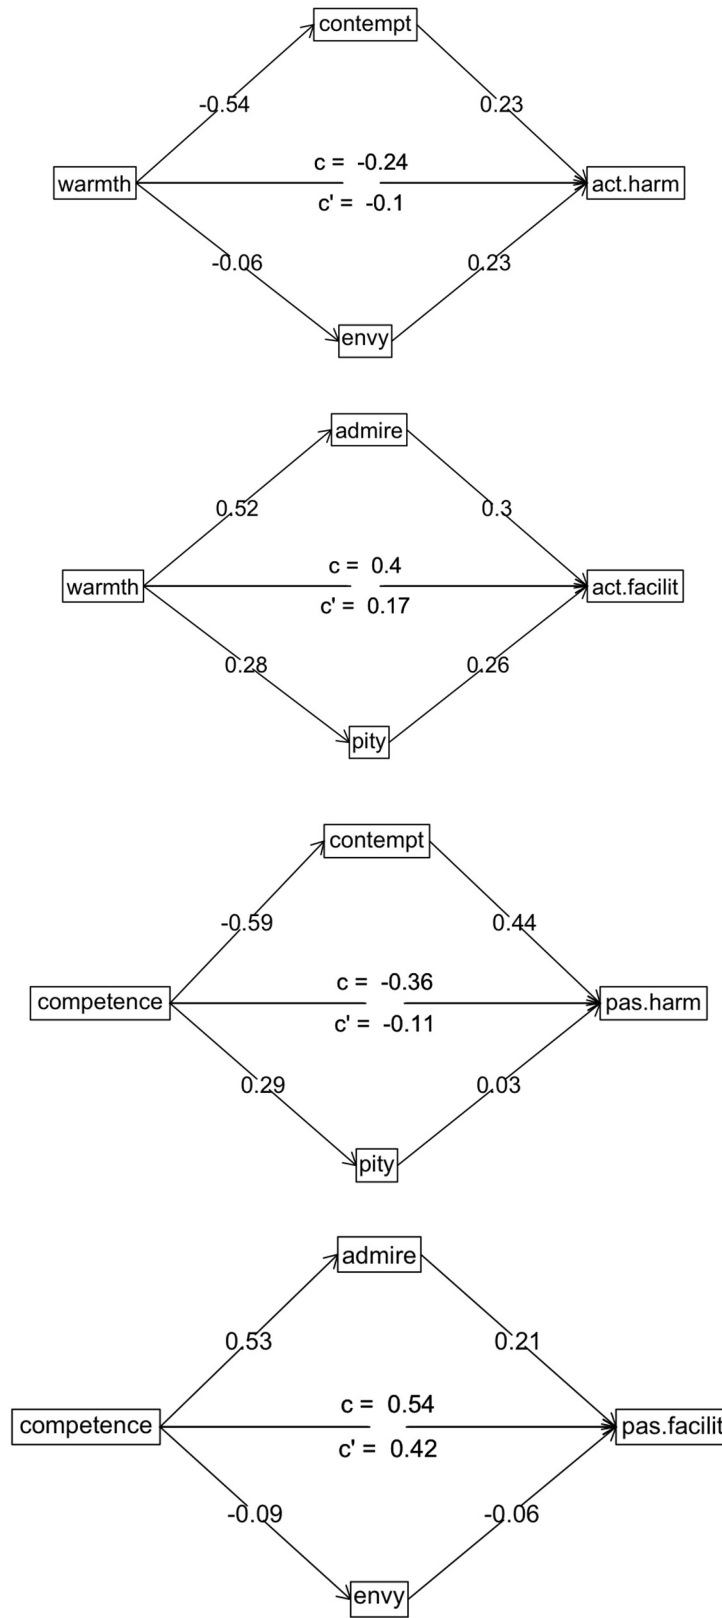

**Supplementary Figure 20.** BIAS map mediation models of stereotypes predicting emotions predicting behaviors in the “Hungarian + individual perspective” experimental condition.

**Supplementary Table 9.** Means and standard deviations of the BIAS map subscales.

| Subscale             | Roma + shared cultural<br>(n = 319) |           | Hungarians + shared cultural<br>(n = 311) |           | Roma + individual<br>(n = 323) |           | Hungarians + individual<br>(n = 316) |           |
|----------------------|-------------------------------------|-----------|-------------------------------------------|-----------|--------------------------------|-----------|--------------------------------------|-----------|
|                      | <i>M</i>                            | <i>SD</i> | <i>M</i>                                  | <i>SD</i> | <i>M</i>                       | <i>SD</i> | <i>M</i>                             | <i>SD</i> |
| Competence           | 2.37                                | 0.84      | 3.31                                      | 0.81      | 2.63                           | 0.85      | 3.41                                 | 0.87      |
| Warmth               | 2.22                                | 0.86      | 3.19                                      | 0.86      | 2.52                           | 0.91      | 3.28                                 | 0.98      |
| Status               | 1.75                                | 0.7       | 3.21                                      | 0.62      | 1.93                           | 0.82      | 3.15                                 | 0.74      |
| Competition          | 3.96                                | 1         | 3.24                                      | 1         | 3.82                           | 1.11      | 2.85                                 | 1.13      |
| Contempt             | 4.16                                | 0.77      | 3.4                                       | 0.92      | 3.5                            | 1.7       | 1.96                                 | 1.3       |
| Admiration           | 1.43                                | 0.62      | 2.6                                       | 0.83      | 1.67                           | 0.82      | 2.14                                 | 0.98      |
| Pity                 | 1.87                                | 0.8       | 2.25                                      | 0.78      | 2.3                            | 0.94      | 2.2                                  | 0.88      |
| Envy                 | 2.29                                | 1.16      | 2.56                                      | 0.97      | 1.46                           | 0.78      | 1.5                                  | 0.77      |
| Active harm          | 3.41                                | 0.79      | 2.69                                      | 0.82      | 1.44                           | 0.65      | 1.38                                 | 0.71      |
| Passive harm         | 3.37                                | 0.93      | 2.57                                      | 0.9       | 1.79                           | 0.82      | 1.52                                 | 0.81      |
| Active facilitation  | 2.4                                 | 0.94      | 2.74                                      | 0.74      | 1.87                           | 0.91      | 2.25                                 | 0.98      |
| Passive facilitation | 2.15                                | 0.71      | 3.4                                       | 0.73      | 2.3                            | 0.86      | 2.87                                 | 0.97      |

**Supplementary Table 2.** *Skewness and kurtosis of the BIAS map subscales.*

| Subscale             | Roma + shared cultural |          | Hungarians + shared cultural |          | Roma + individual |          | Hungarians + individual |          |
|----------------------|------------------------|----------|------------------------------|----------|-------------------|----------|-------------------------|----------|
|                      | Skew                   | Kurtosis | Skew                         | Kurtosis | Skew              | Kurtosis | Skew                    | Kurtosis |
| Competence           | 0.13                   | -0.26    | 0.03                         | 0.25     | -0.05             | -0.23    | 0.03                    | 0.14     |
| Warmth               | 0.34                   | -0.36    | -0.02                        | -0.15    | 0.24              | -0.17    | -0.09                   | -0.18    |
| Status               | 0.94                   | 0.9      | 0.15                         | 0.25     | 0.68              | -0.25    | 0.09                    | 1.19     |
| Competition          | -1.08                  | 0.82     | -0.28                        | -0.43    | -0.77             | -0.27    | 0.04                    | -0.84    |
| Contempt             | -0.87                  | 0.63     | -0.14                        | -0.47    | 0.01              | -0.68    | 0.91                    | 0.12     |
| Admiration           | 1.37                   | 0.88     | 0.25                         | -0.93    | 1.1               | 0.53     | 0.42                    | -0.54    |
| Pity                 | 0.65                   | 0        | 0.05                         | -0.72    | 0.63              | -0.34    | 0.38                    | -0.2     |
| Envy                 | 0.67                   | -0.42    | 0.09                         | -0.52    | 1.71              | 2.2      | 1.53                    | 1.98     |
| Active harm          | 0.11                   | -0.1     | 0.02                         | -0.17    | 1.81              | 4.7      | 2.9                     | 4.19     |
| Passive harm         | -0.14                  | -0.28    | 0.04                         | -0.44    | 0.98              | 0.72     | 1.64                    | 2.25     |
| Active facilitation  | 0.38                   | -0.06    | 0.01                         | 0.7      | 0.85              | -0.13    | 0.29                    | -0.51    |
| Passive facilitation | 0.06                   | -0.47    | -0.14                        | 0.34     | 0.63              | 0.38     | 0.09                    | -0.61    |

**Supplementary Table 3.** *Cronbach's alphas for respective experimental conditions for BIAS map subscales and test of differences between alphas for experimental conditions.*

|                             | Competence | Warmth | Status | Competition |
|-----------------------------|------------|--------|--------|-------------|
| Roma + shared cultural      | .80        | .83    | .64    | .71         |
| Roma + individual           | .84        | .85    | .74    | .80         |
| Hungarian + shared cultural | .87        | .86    | .70    | .80         |
| Hungarian + individual      | .91        | .91    | .83    | .84         |
| df                          | 3          | 3      | 3      | 3           |
| $\chi^2$                    | 24.59      | 19.04  | 27.45  | 13.17       |
| p-value                     | <.001      | <.001  | <.001  | .004        |

**Supplementary Table 4.** *Internal consistency of the BIAS map social structure and stereotypes subscales per experimental condition.*

| Subscale    | Roma + shared cultural |                     | Hungarian + shared cultural |                     |
|-------------|------------------------|---------------------|-----------------------------|---------------------|
|             | Cronbach's $\alpha$    | McDonald's $\omega$ | Cronbach's $\alpha$         | McDonald's $\omega$ |
| Competence  | .8                     | .81                 | .87                         | .87                 |
| Warmth      | .83                    | .83                 | .86                         | .86                 |
| Status      | .64                    | .67                 | .69                         | .7                  |
| Competition | .71                    | .72                 | .8                          | .8                  |
| Subscale    | Roma + individual      |                     | Hungarian + individual      |                     |
|             | Cronbach's $\alpha$    | McDonald's $\omega$ | Cronbach's $\alpha$         | McDonald's $\omega$ |
| Competence  | .84                    | .84                 | .91                         | .91                 |
| Warmth      | .85                    | .85                 | .91                         | .91                 |
| Status      | .74                    | .75                 | .83                         | .83                 |
| Competition | .8                     | .81                 | .84                         | .84                 |



**Supplementary Table 5.** *Internal consistency of the BIAS map emotions and behavioural tendencies subscales per experimental condition.*

| Subscale             | Roma + shared cultural |                | Hungarian + shared cultural |                |
|----------------------|------------------------|----------------|-----------------------------|----------------|
|                      | Cronbach's $\alpha$    | Spearman-Brown | Cronbach's $\alpha$         | Spearman-Brown |
| Contempt             | .46                    | .47            | .71                         | .71            |
| Admiration           | .52                    | .53            | .68                         | .68            |
| Pity                 | .7                     | .7             | .66                         | .66            |
| Envy                 | .68                    | .68            | .78                         | .78            |
| Active facilitation  | .65                    | .65            | .6                          | .6             |
| Active harm          | .22                    | .22            | .53                         | .53            |
| Passive facilitation | .56                    | .56            | .6                          | .6             |
| Passive harm         | .57                    | .57            | .68                         | .68            |
|                      | Roma + individual      |                | Hungarian + individual      |                |
|                      | Cronbach's $\alpha$    | Spearman-Brown | Cronbach's $\alpha$         | Spearman-Brown |
| Contempt             | .67                    | .67            | .79                         | .79            |
| Admiration           | .76                    | .76            | .81                         | .81            |
| Pity                 | .76                    | .76            | .59                         | .6             |
| Envy                 | .7                     | .7             | .81                         | .81            |
| Active facilitation  | .75                    | .75            | .77                         | .77            |
| Active harm          | .5                     | .54            | .78                         | .78            |
| Passive facilitation | .6                     | .6             | .66                         | .66            |
| Passive harm         | .45                    | .52            | .8                          | .81            |

**Supplementary Table 6.** *Parallel multiple mediation model for active harm.*

| Active harm                               | Roma + shared cultural       |        |          |         |         |
|-------------------------------------------|------------------------------|--------|----------|---------|---------|
|                                           | Coef.                        | SE     | <i>p</i> | CI low  | CI high |
| Total effect of warmth                    | -0.0454                      | 0.052  | .3842    |         |         |
| Direct effect of warmth                   | 0.0001                       | 0.0509 | .999     |         |         |
| Bootstrapped indirect effect of warmth    | -0.0469                      | 0.0224 |          | -0.0944 | -0.0083 |
| Bootstrapped indirect effect via contempt | -0.0469                      | 0.0215 |          | -0.0925 | -0.0108 |
| Bootstrapped indirect effect via envy     | 0                            | 0.0043 |          | -0.0095 | 0.009   |
| $R^2 = 0.0856, p < .0001$                 |                              |        |          |         |         |
|                                           | Roma + individual            |        |          |         |         |
|                                           | Coef.                        | SE     | <i>p</i> | CI low  | CI high |
| Total effect of warmth                    | -0.1433                      | 0.0395 | .0003349 |         |         |
| Direct effect of warmth                   | -0.0332                      | 0.0452 | .4622    |         |         |
| Bootstrapped indirect effect of warmth    | -0.1097                      | 0.031  |          | -0.1743 | -0.052  |
| Bootstrapped indirect effect via contempt | -0.1208                      | 0.0292 |          | -0.1816 | -0.0677 |
| Bootstrapped indirect effect via envy     | 0.0111                       | 0.0088 |          | -0.0033 | 0.0309  |
| $R^2 = 0.1508, p < .0001$                 |                              |        |          |         |         |
|                                           | Hungarians + shared cultural |        |          |         |         |
|                                           | Coef.                        | SE     | <i>p</i> | CI low  | CI high |
| Total effect of warmth                    | -0.2858                      | 0.0518 | <.0001   |         |         |
| Direct effect of warmth                   | -0.0806                      | 0.0476 | .0918    |         |         |
| Bootstrapped indirect effect of warmth    | -0.2052                      | 0.0386 |          | -0.2844 | -0.1325 |
| Bootstrapped indirect effect via contempt | -0.1998                      | 0.0364 |          | -0.2752 | -0.1316 |
| Bootstrapped indirect effect via envy     | -0.0054                      | 0.0069 |          | -0.0224 | 0.005   |
| $R^2 = 0.3581, p < .0001$                 |                              |        |          |         |         |
|                                           | Hungarians + individual      |        |          |         |         |
|                                           | Coef.                        | SE     | <i>p</i> | CI low  | CI high |
| Total effect of warmth                    | -0.2364                      | 0.0385 | <.0001   |         |         |
| Direct effect of warmth                   | -0.0992                      | 0.04   | .01372   |         |         |
| Bootstrapped indirect effect of warmth    | -0.1381                      | 0.0365 |          | -0.2129 | -0.071  |
| Bootstrapped indirect effect via contempt | -0.1251                      | 0.0361 |          | -0.201  | -0.0598 |
| Bootstrapped indirect effect via envy     | -0.013                       | 0.0116 |          | -0.038  | 0.0077  |
| $R^2 = 0.3062, p < .0001$                 |                              |        |          |         |         |

**Supplementary Table 7. Parallel multiple mediation model for active facilitation.**

| Active facilitation                         | Roma + shared cultural       |        |          |         |         |
|---------------------------------------------|------------------------------|--------|----------|---------|---------|
|                                             | Coef.                        | SE     | <i>p</i> | CI low  | CI high |
| Total effect of warmth                      | 0.1495                       | 0.0609 | .0147    |         |         |
| Direct effect of warmth                     | 0.007                        | 0.0613 | .909     |         |         |
| Bootstrapped indirect effect of warmth      | 0.1438                       | 0.0342 |          | 0.0819  | 0.2155  |
| Bootstrapped indirect effect via admiration | 0.03                         | 0.0227 |          | -0.0104 | 0.0787  |
| Bootstrapped indirect effect via pity       | 0.1137                       | 0.0317 |          | 0.0585  | 0.1808  |
| $R^2 = 0.1387, p < .0001$                   |                              |        |          |         |         |
|                                             | Roma + individual            |        |          |         |         |
|                                             | Coef.                        | SE     | <i>p</i> | CI low  | CI high |
| Total effect of warmth                      | 0.3777                       | 0.0521 | <.0001   |         |         |
| Direct effect of warmth                     | 0.0801                       | 0.0526 | .1283    |         |         |
| Bootstrapped indirect effect of warmth      | 0.2995                       | 0.0429 |          | 0.2184  | 0.3861  |
| Bootstrapped indirect effect via admiration | 0.1441                       | 0.0421 |          | 0.0681  | 0.2323  |
| Bootstrapped indirect effect via pity       | 0.1554                       | 0.0326 |          | 0.0954  | 0.2251  |
| $R^2 = 0.3783, p < .0001$                   |                              |        |          |         |         |
|                                             | Hungarians + shared cultural |        |          |         |         |
|                                             | Coef.                        | SE     | <i>p</i> | CI low  | CI high |
| Total effect of warmth                      | 0.1735                       | 0.0481 | .000363  |         |         |
| Direct effect of warmth                     | 0.0818                       | 0.0473 | .08493   |         |         |
| Bootstrapped indirect effect of warmth      | 0.0924                       | 0.0248 |          | 0.0481  | 0.1452  |
| Bootstrapped indirect effect via admiration | 0.0707                       | 0.0253 |          | 0.0283  | 0.1254  |
| Bootstrapped indirect effect via pity       | 0.0217                       | 0.0165 |          | -0.0064 | 0.059   |
| $R^2 = 0.1586, p < .0001$                   |                              |        |          |         |         |
|                                             | Hungarians + individual      |        |          |         |         |
|                                             | Coef.                        | SE     | <i>p</i> | CI low  | CI high |
| Total effect of warmth                      | 0.4042                       | 0.0513 | <.0001   |         |         |
| Direct effect of warmth                     | 0.1721                       | 0.0538 | .001524  |         |         |
| Bootstrapped indirect effect of warmth      | 0.2313                       | 0.0378 |          | 0.1593  | 0.3065  |
| Bootstrapped indirect effect via admiration | 0.1575                       | 0.0394 |          | 0.0816  | 0.2367  |
| Bootstrapped indirect effect via pity       | 0.0738                       | 0.024  |          | 0.03    | 0.1252  |
| $R^2 = 0.3407, p < .0001$                   |                              |        |          |         |         |

**Supplementary Table 8.** *Parallel multiple mediation model for passive harm.*

| Passive harm                               | Roma + shared cultural       |        |        |         |         |
|--------------------------------------------|------------------------------|--------|--------|---------|---------|
|                                            | Coef.                        | SE     | p      | CI low  | CI high |
| Total effect of competence                 | 0.0394                       | 0.0628 | .5304  |         |         |
| Direct effect of competence                | 0.1269                       | 0.0652 | .05257 |         |         |
| Bootstrapped indirect effect of competence | -0.0878                      | 0.0285 |        | -0.1482 | -0.037  |
| Bootstrapped indirect effect via contempt  | -0.0285                      | 0.017  |        | -0.0671 | -0.0008 |
| Bootstrapped indirect effect via pity      | -0.0592                      | 0.0259 |        | -0.1138 | -0.013  |
| $R^2 = 0.0519, p = 0.0007681$              |                              |        |        |         |         |
|                                            | Roma + individual            |        |        |         |         |
|                                            | Coef.                        | SE     | p      | CI low  | CI high |
| Total effect of competence                 | -0.2959                      | 0.0509 | <.0001 |         |         |
| Direct effect of competence                | -0.0635                      | 0.053  | .2325  |         |         |
| Bootstrapped indirect effect of competence | -0.2324                      | 0.0431 |        | -0.3198 | -0.3198 |
| Bootstrapped indirect effect via contempt  | -0.2615                      | 0.043  |        | -0.3499 | -0.1798 |
| Bootstrapped indirect effect via pity      | 0.0292                       | 0.0193 |        | -0.0073 | 0.0695  |
| $R^2 = 0.3107, p <.0001$                   |                              |        |        |         |         |
|                                            | Hungarians + shared cultural |        |        |         |         |
|                                            | Coef.                        | SE     | p      | CI low  | CI high |
| Total effect of competence                 | -0.2809                      | 0.0614 | <.0001 |         |         |
| Direct effect of competence                | -0.0864                      | 0.0589 | .1434  |         |         |
| Bootstrapped indirect effect of competence | -0.1945                      | 0.0418 |        | -0.2806 | -0.1171 |
| Bootstrapped indirect effect via contempt  | -0.2157                      | 0.0407 |        | -0.3    | -0.1414 |
| Bootstrapped indirect effect via pity      | 0.0212                       | 0.0137 |        | -0.0005 | 0.0525  |
| $R^2 = 0.2713, p <.0001$                   |                              |        |        |         |         |
|                                            | Hungarians + individual      |        |        |         |         |
|                                            | Coef.                        | SE     | p      | CI low  | CI high |
| Total effect of competence                 | -0.3636                      | 0.0488 | <.0001 |         |         |
| Direct effect of competence                | -0.1128                      | 0.0495 | .02333 |         |         |
| Bootstrapped indirect effect of competence | -0.2515                      | 0.0483 |        | -0.3494 | -0.1636 |
| Bootstrapped indirect effect via contempt  | -0.2614                      | 0.0467 |        | -0.3558 | -0.1759 |
| Bootstrapped indirect effect via pity      | 0.0099                       | 0.0119 |        | -0.013  | 0.0341  |
| $R^2 = 0.3867, p <.0001$                   |                              |        |        |         |         |

**Supplementary Table 9. Parallel multiple mediation model for passive facilitation.**

| Passive facilitation                        | Roma + shared cultural       |         |          |         |         |
|---------------------------------------------|------------------------------|---------|----------|---------|---------|
|                                             | Coef.                        | SE      | <i>p</i> | CI low  | CI high |
| Total effect of competence                  | 0.3087                       | 0.0441  | <.0001   |         |         |
| Direct effect of competence                 | 0.2517                       | 0.0451  | <.0001   |         |         |
| Bootstrapped indirect effect of competence  | 0.0572                       | 0.0187  |          | 0.0244  | 0.097   |
| Bootstrapped indirect effect via admiration | 0.0577                       | 0.0187  |          | 0.0251  | 0.0979  |
| Bootstrapped indirect effect via envy       | -0.0005                      | -0.0005 |          | -0.0127 | 0.0107  |
| $R^2 = 0.1833, p <.0001$                    |                              |         |          |         |         |
|                                             | Roma + individual            |         |          |         |         |
|                                             | Coef.                        | SE      | <i>p</i> | CI low  | CI high |
| Total effect of competence                  | 0.4441                       | 0.0506  | <.0001   |         |         |
| Direct effect of competence                 | 0.2923                       | 0.0525  | <.0001   |         |         |
| Bootstrapped indirect effect of competence  | 0.153                        | 0.0368  |          | 0.0863  | 0.2303  |
| Bootstrapped indirect effect via admiration | 0.1518                       | 0.0384  |          | 0.0827  | 0.2325  |
| Bootstrapped indirect effect via envy       | 0.0012                       | 0.0053  |          | -0.0096 | 0.0129  |
| $R^2 = 0.2955, p <.0001$                    |                              |         |          |         |         |
|                                             | Hungarians + shared cultural |         |          |         |         |
|                                             | Coef.                        | SE      | <i>p</i> | CI low  | CI high |
| Total effect of competence                  | 0.3624                       | 0.0468  | <.0001   |         |         |
| Direct effect of competence                 | 0.2815                       | 0.0474  | <.0001   |         |         |
| Bootstrapped indirect effect of competence  | 0.0814                       | 0.0222  |          | 0.042   | 0.1291  |
| Bootstrapped indirect effect via admiration | 0.081                        | 0.0219  |          | 0.0427  | 0.1282  |
| Bootstrapped indirect effect via envy       | 0.0003                       | 0.0034  |          | -0.0062 | 0.0082  |
| $R^2 = 0.2338, p <.0001$                    |                              |         |          |         |         |
|                                             | Hungarians + individual      |         |          |         |         |
|                                             | Coef.                        | SE      | <i>p</i> | CI low  | CI high |
| Total effect of competence                  | 0.5402                       | 0.0556  | <.0001   |         |         |
| Direct effect of competence                 | 0.4233                       | 0.0638  | <.0001   |         |         |
| Bootstrapped indirect effect of competence  | 0.1164                       | 0.036   |          | 0.0466  | 0.1882  |
| Bootstrapped indirect effect via admiration | 0.1097                       | 0.0341  |          | 0.0341  | 0.0341  |
| Bootstrapped indirect effect via envy       | 0.0067                       | 0.0067  |          | -0.0042 | 0.0257  |
| $R^2 = 0.262, p <.0001$                     |                              |         |          |         |         |
